# Supplementary material for: New promising lithium malonatoborate salts for high voltage lithium ion batteries
Source: Royal Society of Chemistry journal article supplement (doi:10.1039/c6ta07757a), 2016-12-01
Supplement: c6ta07757a1.pdf [file c6ta07757a1.pdf]

## Electronic Supporting Information

### New Promising Lithium Malonatoborate Salts for Lithium Ion Battery Application

Xiao-Guang Sun,<sup>a\*</sup> Shun Wan,<sup>a</sup> Hongyu Guang,<sup>b</sup> Youxing Fang,<sup>ac</sup>

Kimberly Shawn Reeves,<sup>d</sup> Miaofang Chi,<sup>d</sup> Sheng Dai<sup>ac</sup>

<sup>a</sup> Chemical Sciences Division, Oak Ridge National Laboratory, One Bethel Valley Road, Oak Ridge, TN 37831, USA

<sup>b</sup> Department of Chemistry, Northeast Normal University, 5268 Renmin Street, Changchun, Jilin 130012, P. R. China

<sup>c</sup> Department of Chemistry, University of Tennessee, Knoxville, Tennessee 37996, USA

<sup>d</sup> Center for Nanophase Materials Sciences, Oak Ridge National Laboratory, One Bethel Valley Road, Oak Ridge, TN 37831, USA

\*Correspondence - sunx@ornl.gov

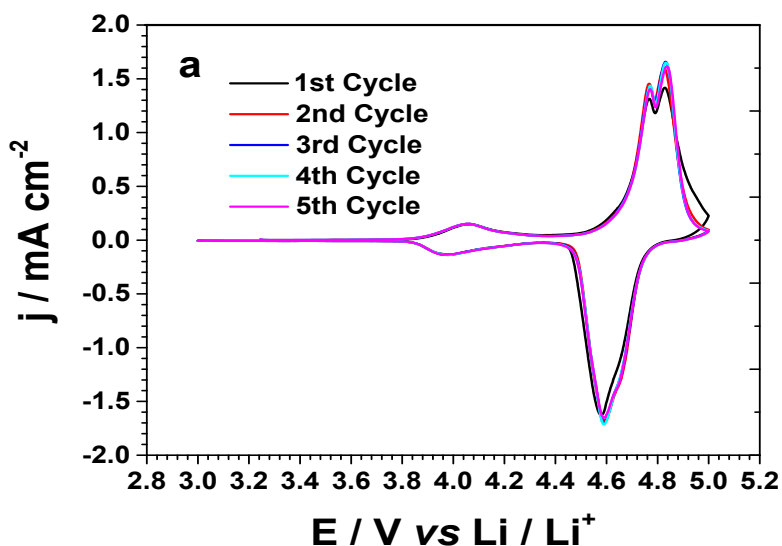

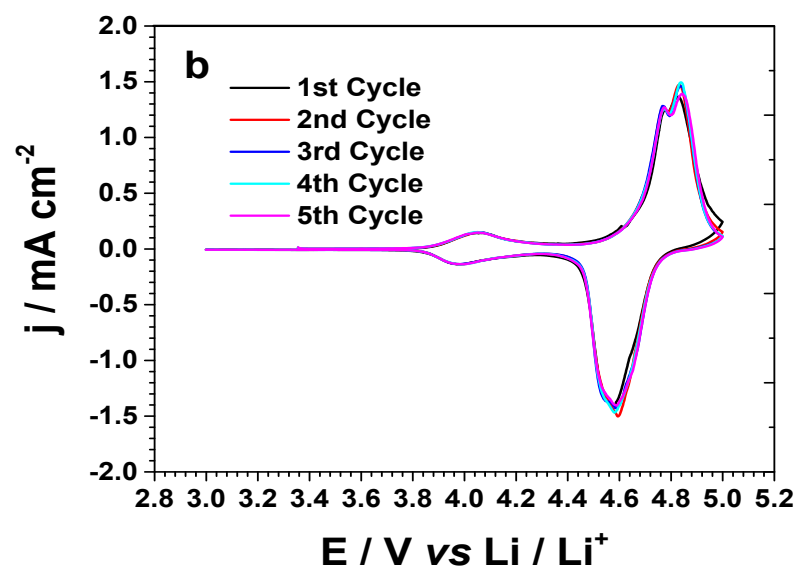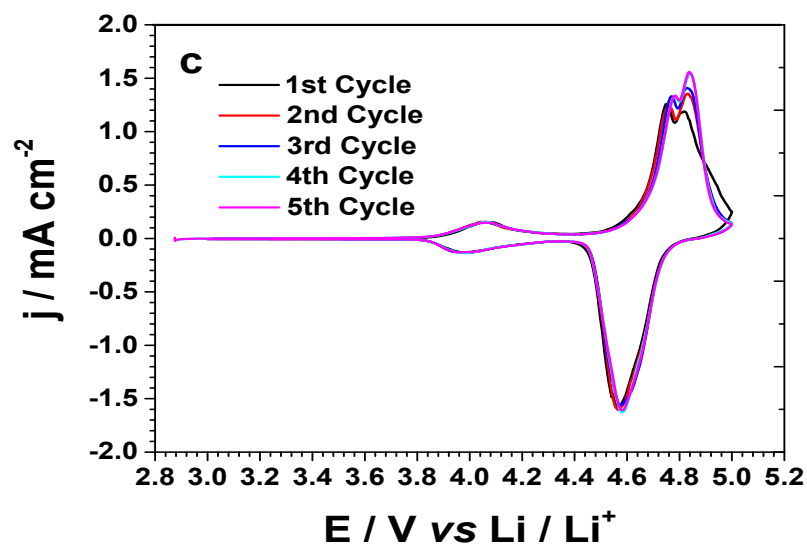

Fig. S1. Cyclic voltammograms (CVs) of  $\text{LiNi}_{0.5}\text{Mn}_{1.5}\text{O}_4$  in (a) 1.0M LiDFMFMB, (b) 1.0M LiDFEFMB, and (c) 1.0 M LiDFPFMB electrolyte at a scan rate of 0.05 mV/s. Lithium is used as both counter and reference electrode.

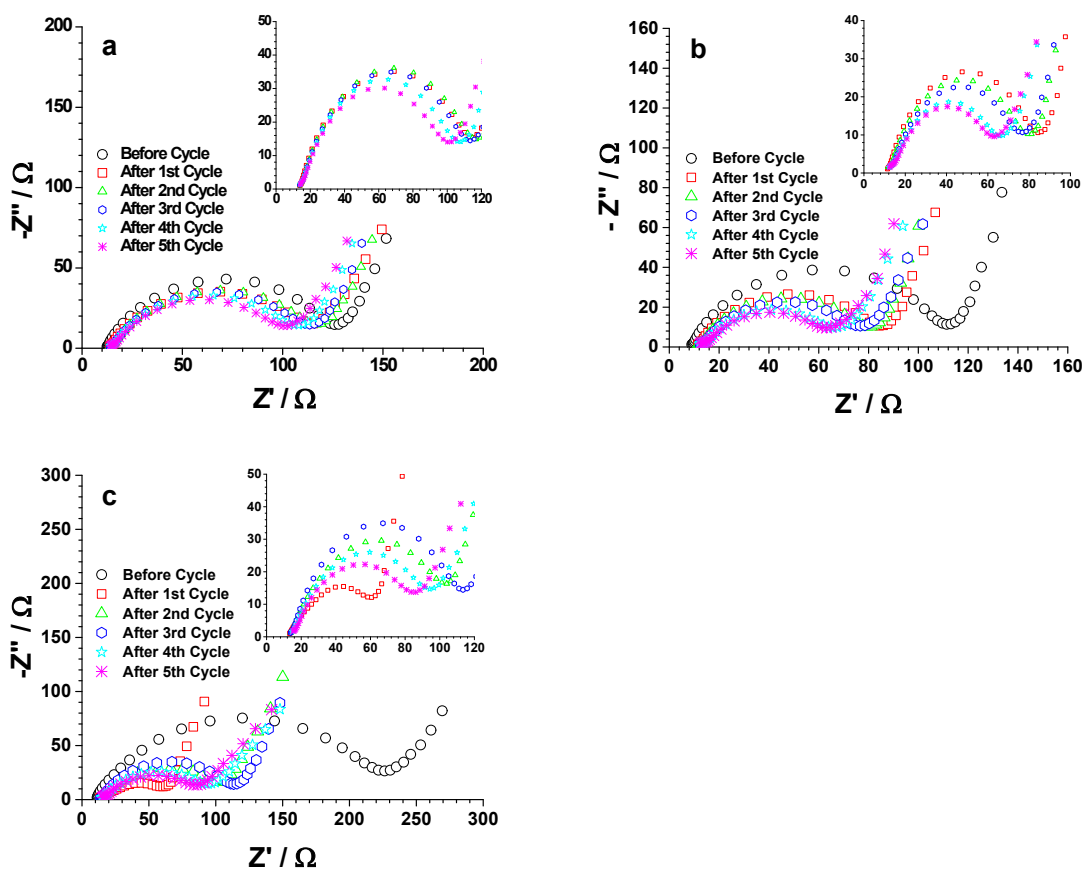

Fig. S2. Electrochemical impedance spectra of  $\text{LiNi}_{0.5}\text{Mn}_{1.5}\text{O}_4$  in (a) 1.0 M LiDFMFMB, (b) 1.0 M LiDFEFMB, and (c) 1.0 M LiDFPFMB electrolyte at different CV cycles at a scan rate of 0.05 mV/s.

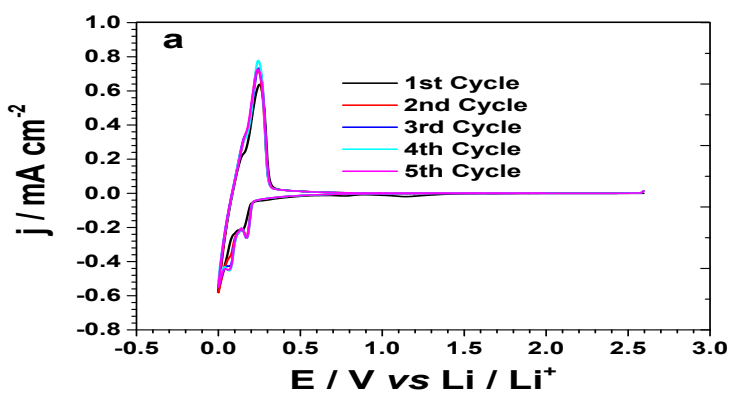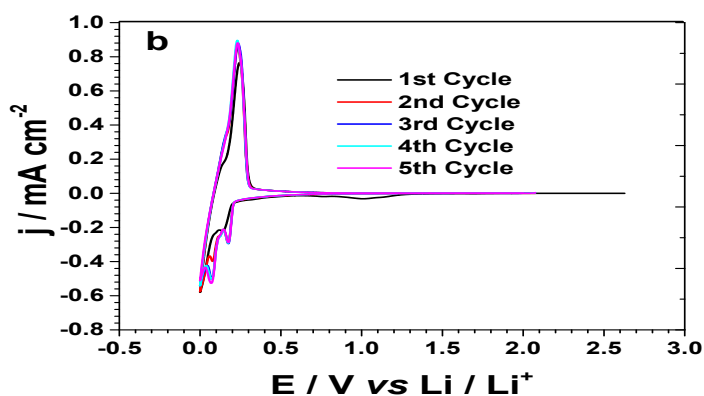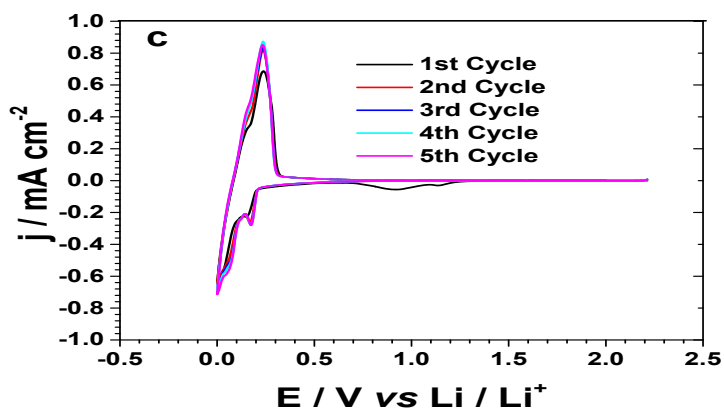

Fig. S3. Cyclic voltammograms (CVs) of graphite in (a) 1.0M LiDFMFMB, (b) 1.0M LiDFEFMB, and (c) 1.0 M LiDFPFMB electrolyte at a scan rate of 0.05 mV/s. Lithium is used as both counter and reference electrode.

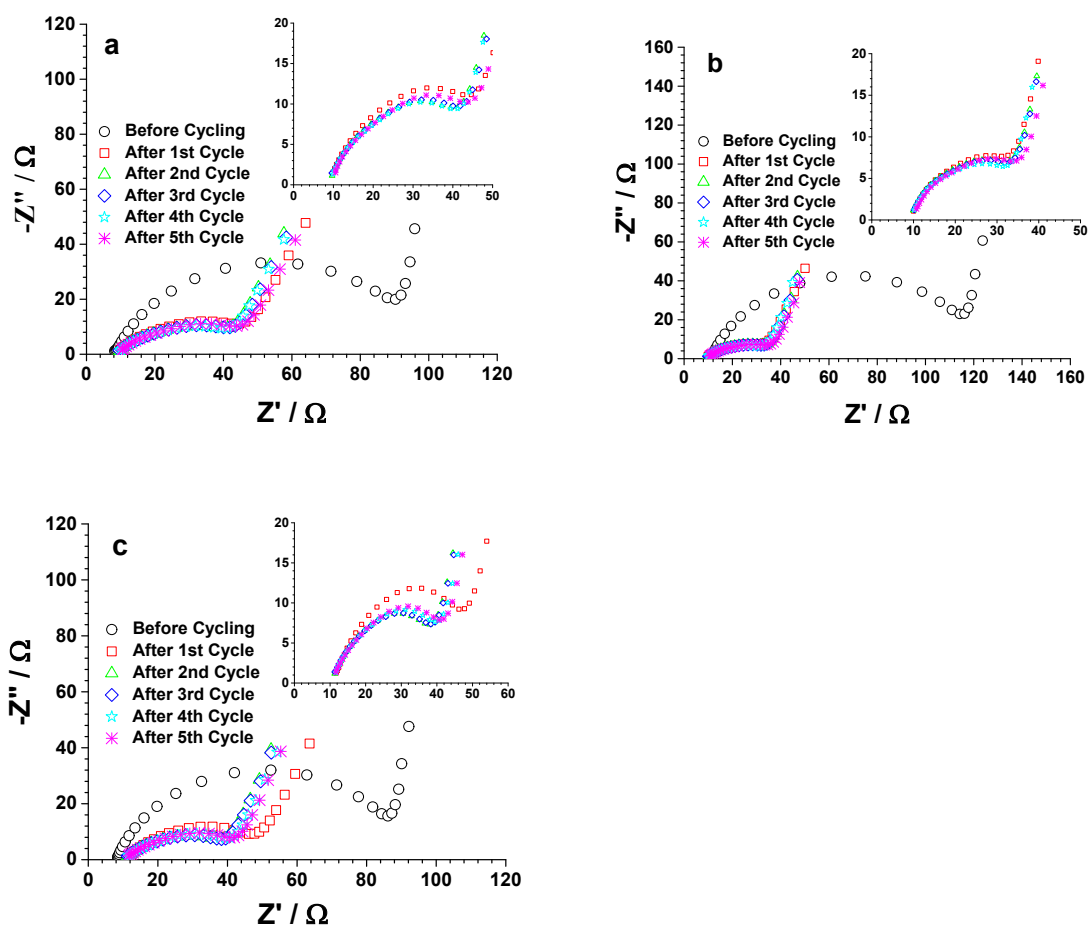

Fig. S4. Electrochemical impedance spectra of graphite in (a) 1.0M LiDFMFMB, (b) 1.0M LiDFEFMB, and (c) 1.0 M LiDFPFMB electrolyte at different CV cycles at a scan rate of 0.05 mV/s.

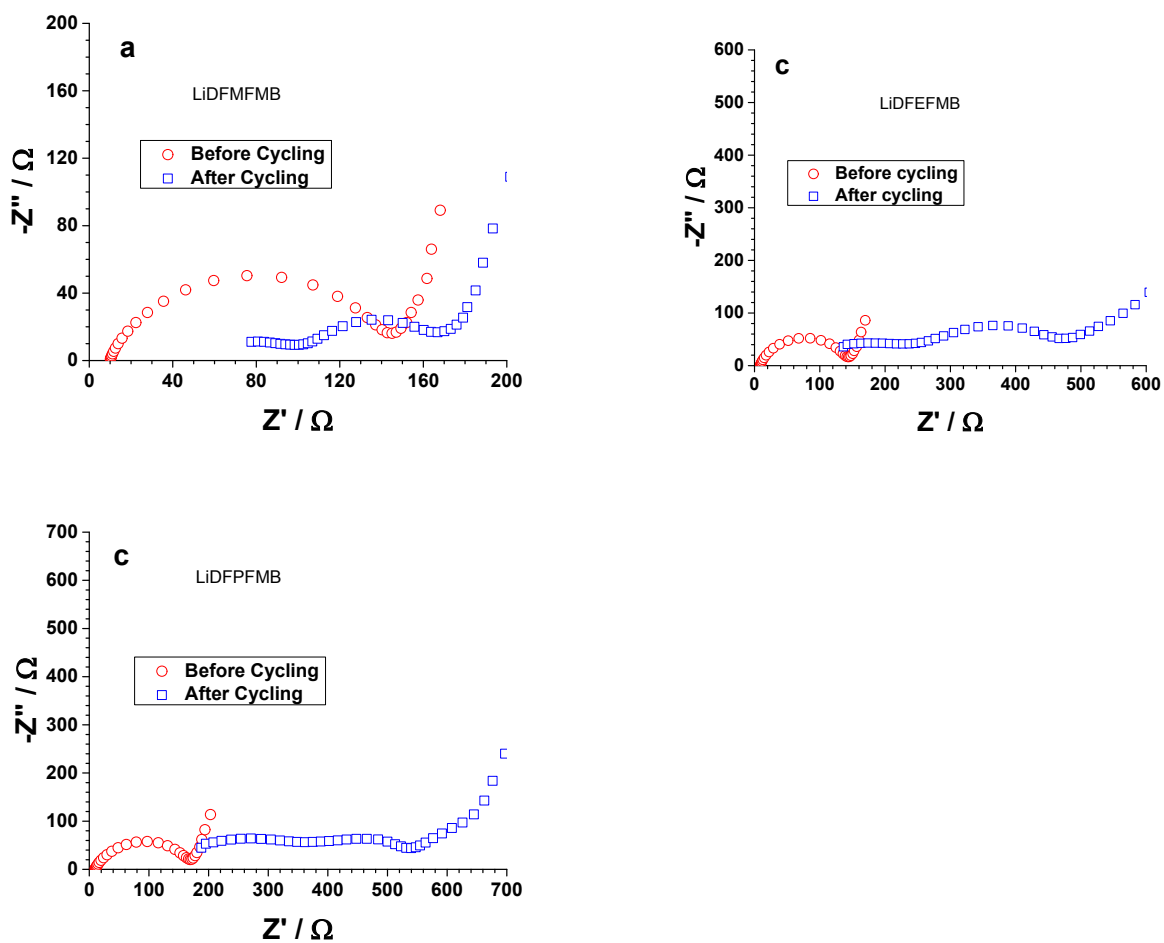

Fig. S5. Electrochemical impedance spectra of the  $\text{LiNi}_{0.5}\text{Mn}_{1.5}\text{O}_4\|\text{Li}$  half-cell before and after cycling at a current rate of  $C/2$  in (a) 1.0 M LiDFMFMB, (b) 1.0 M LiDFEFMB, and (c) 1.0 M LiDFPFMB electrolyte.

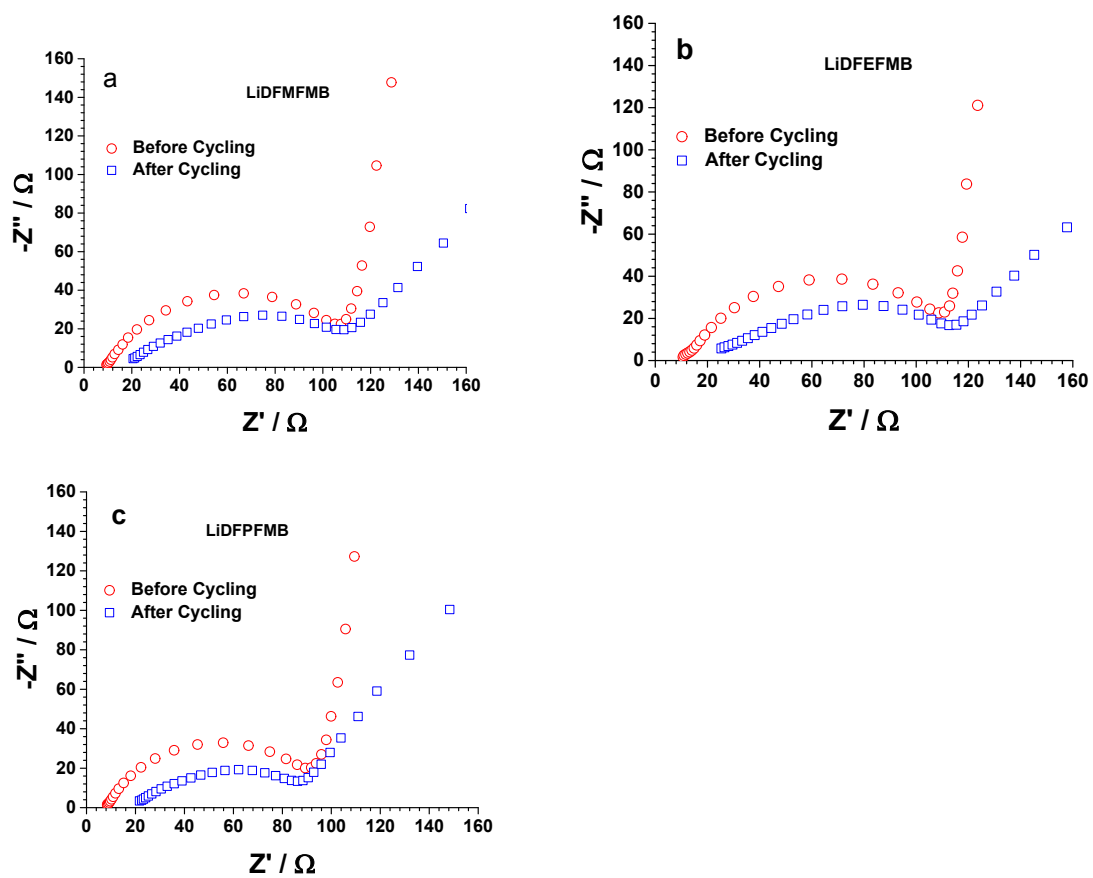

Fig. S6. Electrochemical impedance spectra of the NG||Li half-cell before and after cycling at a current rate of C/5 in (a) 1.0 M LiDFMFMB, (b) 1.0 M LiDFEFMB, and (c) 1.0 M LiDFPFMB electrolyte.

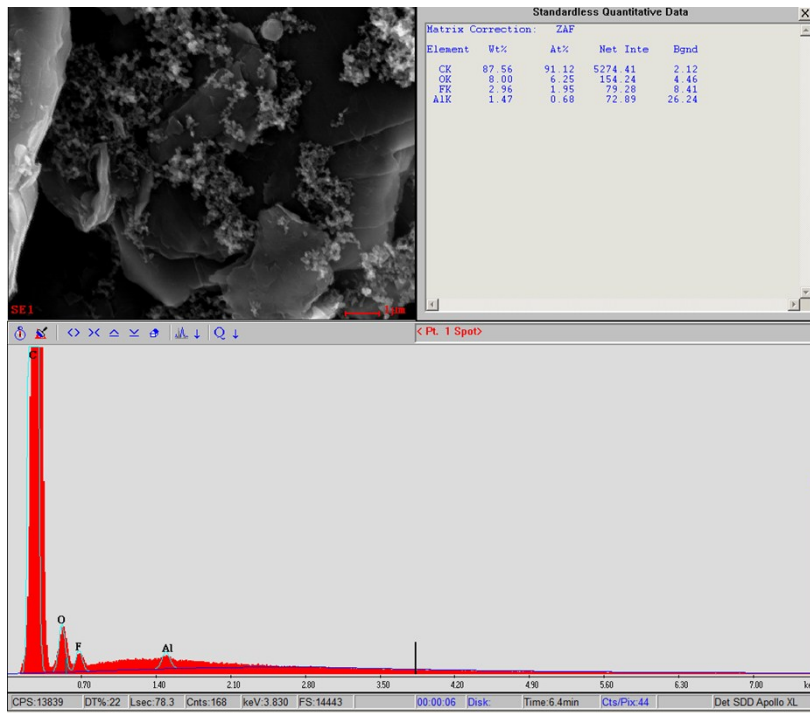

(a) NG-Ref

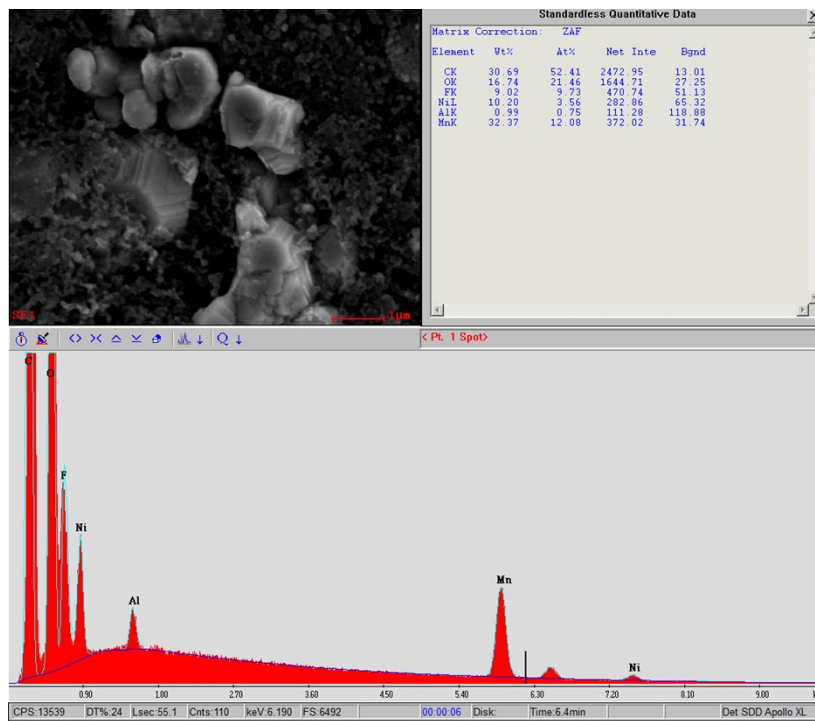

(b) LNMO-Ref



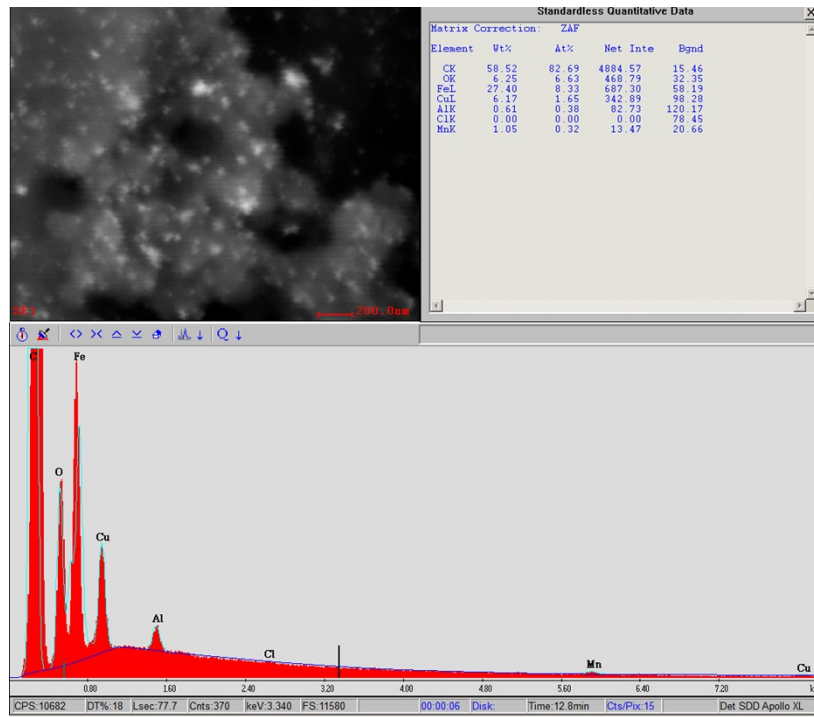

(c) NG-LiDFMFMB

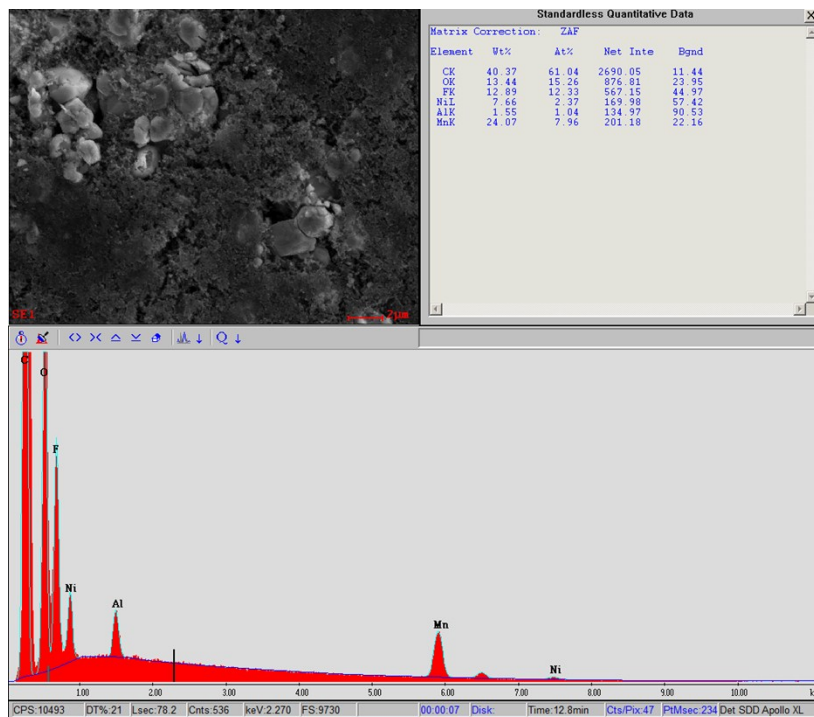

(d) LNMO-LiDFMFMB

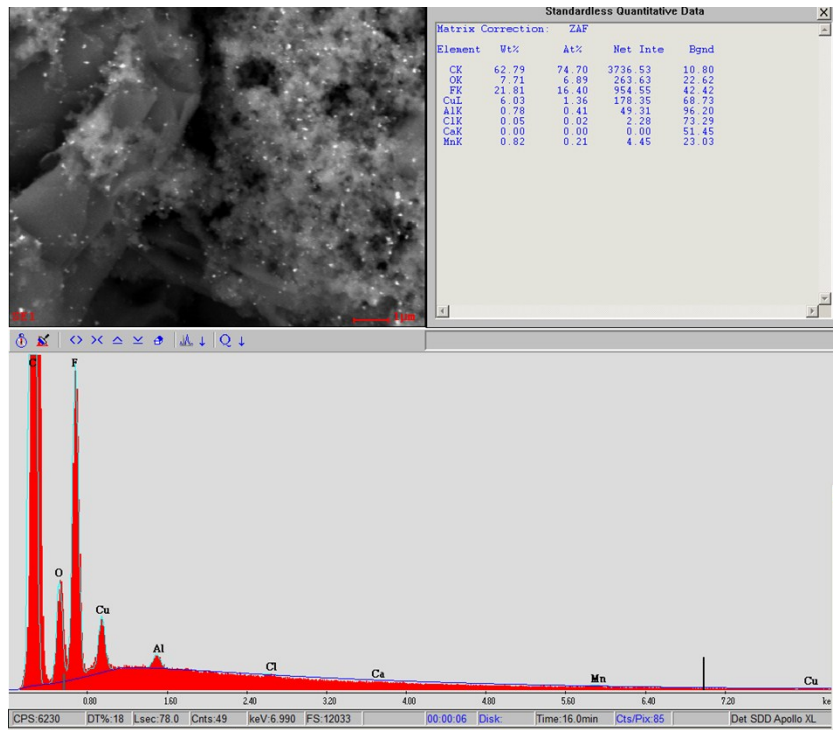

(e) NG-LiDFEFMB

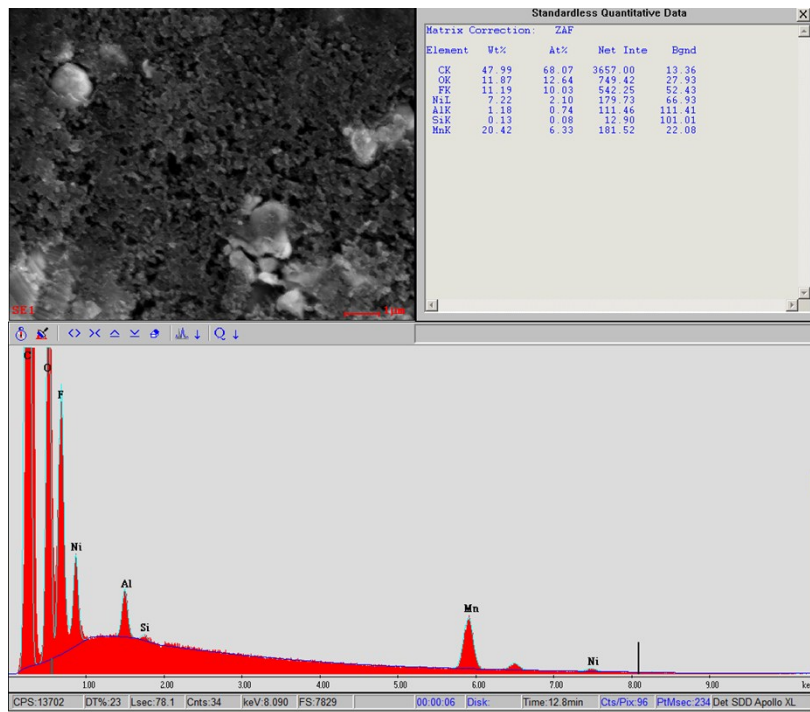

(f) LNMO-LiDFEFMB

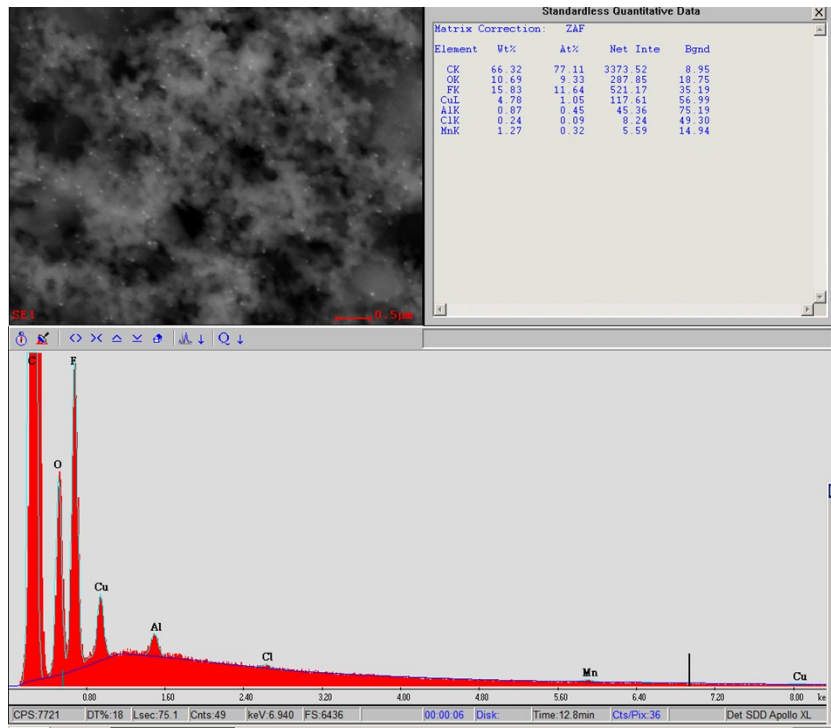

(g) NG-LiDFPFMB

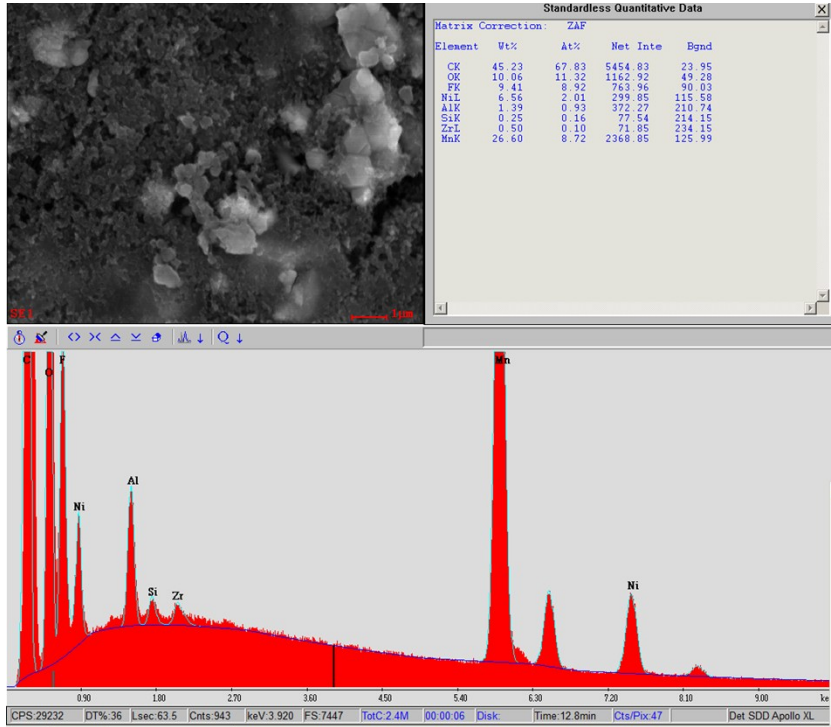

(h) LNMO-LiDFPFMB

**Fig. S7.** SEM images with EDX of pristine graphite (a) and LNMO (b) electrode and cycled graphite electrodes (c, e and g) and LNMO (d, f and h) from the LNMO||NG full cells in 1.0 M LiDFMFMB (c and d), LiDFEFMB (e and f), and LiDFPFMB (g and h), respectively.
